# Supplementary material for: Freestanding flexible molecularly imprinted nanocomposite membranes for selective separation applications: an imitated core–shell PEI@SiO2-based MIM design
Source: Royal Society of Chemistry journal article supplement (doi:10.1039/d0nj03489d), 2020-01-01
Supplement: d0nj03489d1.pdf [file d0nj03489d1.pdf]

**Supporting Information**

**for**

**Free standing flexible molecularly imprinted nanocomposite  
membranes for selective separation applications: An imitated core-  
shell PEI@SiO<sub>2</sub>-based MIMs design**

Faguang Ma,<sup>1,2</sup> Yan Yan,<sup>2</sup> Zhixin Yu,<sup>2</sup> Yilin Wu,<sup>2,3,\*</sup> Xinlin Liu<sup>4,\*</sup>

<sup>1</sup>School of Materials Science and Engineering, Beihua University, Jilin 132013, China

<sup>2</sup>Institute of Green Chemistry and Chemical Technology, Advanced Chemical Engineering Laboratory of Green Materials and Energy of Jiangsu Province, School of Chemistry and Chemical Engineering, Jiangsu University, Zhenjiang 212013, China

<sup>3</sup>School of Chemical Engineering and Technology, Tianjin University, Tianjin 300072, China

<sup>4</sup>School of Energy and Power Engineering, Jiangsu University, Zhenjiang 212013, China

**\*Corresponding authors:**

E-mail addresses: wuyilin@ujs.edu.cn (Y.L. Wu); liuxl@ujs.edu.cn (X.L. Liu)

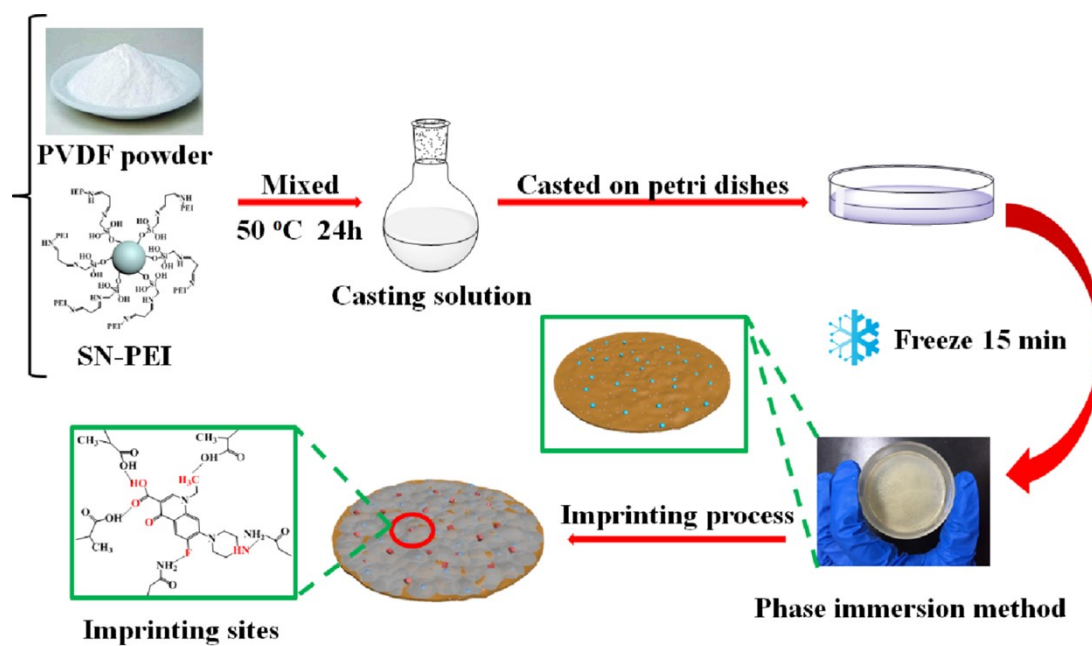

Fig. S1 The synthesis pathway of SPEIMs.
